# Supplementary material
Source: Springer Nature journal article supplement (https://www.springermedizin.de/resource/supplementary/12889_2014_7409_MOESM1_ESM.pdf/9497268)
Supplement: MOESM1 [file 9497268]

14'496

Clients visiting the travel clinic

10.959

Excluded persons (refused participation, have excluding criteria, omitted)

3537

Travelers > 18 years filled a questionnaire on their life habits in Switzerland and during their previous trip

1681 travelers aged 18 – 44 years included in a randomized controlled trial for the prevention of sexual transmitted infections (results not presented here)
